# Supplementary material for: Depression among epileptic patients and its association with drug therapy in sub-Saharan Africa: A systematic review and meta-analysis
Source: PubMed Central journal article supplement (PMC6417665; doi:10.1371/journal.pone.0202613), 2019-03-14
Supplement: pone.0202613.s001.pdf [file pone.0202613.s001.pdf]

**Table 3: Search Strategy**

| Databases                                           | Search Terms                                                                                                                                                                                                                                                                                                                                                                                                                                                                                                                                                                                                                                                              | No of articles identified |
|-----------------------------------------------------|---------------------------------------------------------------------------------------------------------------------------------------------------------------------------------------------------------------------------------------------------------------------------------------------------------------------------------------------------------------------------------------------------------------------------------------------------------------------------------------------------------------------------------------------------------------------------------------------------------------------------------------------------------------------------|---------------------------|
| <b>PubMed</b>                                       | ("depressive disorder"[MeSH Terms] OR ("depressive"[All Fields] AND "disorder"[All Fields]) OR "depressive disorder"[All Fields] OR "depression"[All Fields] OR "depression"[MeSH Terms]) AND ("epilepsy"[MeSH Terms] OR "epilepsy"[All Fields] OR "epileptic"[All Fields]) AND ("patients"[MeSH Terms] OR "patients"[All Fields]) AND Associated[All Fields] AND factors[All Fields] AND ("africa south of the sahara"[MeSH Terms] OR ("africa"[All Fields] AND "south"[All Fields] AND "sahara"[All Fields]) OR "africa south of the sahara"[All Fields] OR ("sub"[All Fields] AND "saharan"[All Fields] AND "africa"[All Fields]) OR "sub Saharan africa"[All Fields]) | 41                        |
| <b>CINAHL (Plus with full text)</b>                 | <b>Thesaurus terms:</b> depression, drug therapy, epilepsy, prevalence, sub-Saharan Africa<br><b>Search Terms:</b> " depression disorder *" OR depressive * OR " depression *" and " epilepsy *" OR " epileptic " AND " drug therapy "OR" treatment" AND "Africa OR sub-Saharan Africa<br>(S1): filter: English, peer reviewed, exclude Medline<br>(S2): with additional filter: Africa, sub-Saharan Africa<br>S1 OR S2                                                                                                                                                                                                                                                   | 22                        |
| <b>Cochrane Library</b>                             | <b>MeSH terms:</b> depression disorder (MeSH), depressive (MeSH), depression (MeSH), epilepsy (MeSH), epileptic (MeSH), Associated (MeSH) factors (MeSH).<br><b>Search Terms:</b> (depression disorder * OR depressive * OR depression * AND (epilepsy[MeSH] OR epileptic[MeSH] AND drug therapy AND sub-Saharan Africa AND English [la]                                                                                                                                                                                                                                                                                                                                  | 21                        |
| <b>PsycINFO</b>                                     | <b>Thesaurus terms:</b> depression, drug therapy, epilepsy, prevalence, sub-Saharan Africa<br><b>Search Terms:</b> " depression disorder *" OR depressive * OR " depression " and "epilepsy*" OR "epileptic" AND drug therapy OR treatment* AND sub-Saharan Africa<br>filter: English, peer reviewed                                                                                                                                                                                                                                                                                                                                                                      | 33                        |
| <b>Embase</b>                                       | <b>Emtree terms:</b> depression, drug therapy, epilepsy, sub-Saharan Africa<br><b>Search 1 Terms:</b> (depression disorder * OR depressive OR depression* AND (epilepsy OR epileptic * AND drug therapy AND (embase) NOT (medline)<br><b>Search 2 Terms:</b> (depression disorder NEXT/1 depressive * OR depression * NEXT/1 depressive * OR depression NEXT/1 phone* AND (epilepsy OR epileptic) AND (drug therapy OR treatment) AND english:la AND [embase]/lim NOT [medline]/lim<br>filter English only and excluded Medline                                                                                                                                           | 16                        |
| <b>Grey Literature; Google &amp; Google Scholar</b> | Variety of key terms used from the above searches                                                                                                                                                                                                                                                                                                                                                                                                                                                                                                                                                                                                                         | 34                        |
