# Supplementary material for: Depression among epileptic patients and its association with drug therapy in sub-Saharan Africa: A systematic review and meta-analysis
Source: PubMed Central journal article supplement (PMC6417665; doi:10.1371/journal.pone.0202613), 2019-03-14
Supplement: pone.0202613.s002.pdf [file pone.0202613.s002.pdf]

|    | Study ID         | Representation | Sampling | Random selection | Non- response bias | Data collection | Case definition | Reliability & validity | Method of data collection | Prevalence period | Numerator & denominator | Summary assessment |
|----|------------------|----------------|----------|------------------|--------------------|-----------------|-----------------|------------------------|---------------------------|-------------------|-------------------------|--------------------|
| 1  | Tsegabrhan et al | 0              | 1        | 0                | 1                  | 1               | 0               | 0                      | 1                         | 1                 | 1                       | 6                  |
| 2  | Tegegne et al    | 0              | 1        | 1                | 0                  | 1               | 1               | 1                      | 1                         | 1                 | 1                       | 8                  |
| 3  | Bifftu et al     | 1              | 1        | 0                | 0                  | 1               | 1               | 0                      | 1                         | 1                 | 1                       | 6                  |
| 4  | Tegegne et al    | 1              | 1        | 0                | 1                  | 0               | 0               | 0                      | 1                         | 1                 | 1                       | 6                  |
| 5  | Bifftu et al     | 0              | 1        | 1                | 1                  | 1               | 1               | 1                      | 1                         | 1                 | 1                       | 9                  |
| 6  | Tilahune et al   | 0              | 1        | 0                | 1                  | 1               | 1               | 1                      | 1                         | 1                 | 1                       | 8                  |
| 7  | Kiko             | 0              | 1        | 1                | 1                  | 1               | 1               | 1                      | 1                         | 1                 | 1                       | 9                  |
| 8  | Adewuya et al    | 0              | 1        | 1                | 1                  | 1               | 1               | 1                      | 1                         | 1                 | 1                       | 9                  |
| 9  | Ayanda et al     | 0              | 0        | 1                | 1                  | 1               | 1               | 1                      | 1                         | 1                 | 1                       | 8                  |
| 10 | Owolabi et al    | 1              | 1        | 1                | 1                  | 1               | 1               | 1                      | 1                         | 1                 | 1                       | 10                 |
| 11 | Mosaku et al     | 0              | 1        | 1                | 1                  | 1               | 0               | 1                      | 1                         | 1                 | 1                       | 8                  |
| 12 | Ogunrin et al    | 0              | 1        | 1                | 0                  | 1               | 1               | 0                      | 1                         | 1                 | 1                       | 7                  |
| 13 | Sezibera et al   | 0              | 1        | 1                | 0                  | 1               | 1               | 1                      | 1                         | 1                 | 1                       | 8                  |
| 14 | Mutabazi         | 1              | 1        | 1                | 1                  | 1               | 1               | 1                      | 1                         | 1                 | 1                       | 10                 |
| 15 | Saadalla et al   | 1              | 1        | 1                | 1                  | 1               | 0               | 1                      | 1                         | 1                 | 1                       | 9                  |
| 16 | Veneviv et al    | 1              | 1        | 1                | 1                  | 1               | 0               | 1                      | 1                         | 1                 | 1                       | 9                  |

Yes=0, No=1

The overall risk of bias scored based on the number of high risk of bias per study: 8–10: 'low risk of bias', 5–7: 'moderate risk' and 0–4: 'high risk'.

**Risk of bias assessment tool: Yes (low risk); No (high risk)**

1. Representation: Was the study population a close representation of the national population?
2. Sampling: Was the sampling frame a true or close representation of the target population?
3. Random selection: Was some form of random selection used to select the sample OR was a census undertaken?
4. Non-response bias: Was the likelihood of non-response bias minimal?
5. Data collection: Were data collected directly from the subjects?
6. Case definition: Was an acceptable case definition used in the study?
7. Reliability and validity of study tool: Was the study instrument that measured the parameter of interest show to have reliability and validity?
8. Data collection: Was the same mode of data collection used for all subjects?
9. Prevalence period: Was the length of the prevalence period for the parameter of interest appropriate?
10. Numerators and denominators: Were the numerator(s) and denominator(s) for the parameter of interest appropriate?
